# Supplementary material
Source: PubMed Central journal article supplement (PMC3003396)
Supplement: supp_M110.154815_jbc.M110.154815-1.pdf [file supp_M110.154815_jbc.M110.154815-1.pdf]

## SUPPLEMENTAL FIGURES

- Supplemental Fig. S1. **Immunocytochemical analysis of the internalization of extracellular PCSK9 and its GOF mutants.** HepG2 cells were incubated for 0 (S1A), 30 (S1B) or 60 (S1C) min at 4°C with condition media of HEK293 cells overexpressing either (a) PCSK9-V5, or (b) the prosegment deletant  $\Delta$ 33-58-PCSK9-V5. Following fixation and permeabilization of the cells, surface binding and internalization of PCSK9 and the mutated PCSK9 constructs as well as the localization of LDLR were detected by immunofluorescence with anti-V5 (*red*) and anti-LDLR antibodies (*green*). Arrows and arrowheads point to the cell surface labeling and the intracellular localization of PCSK9 and LDLR, respectively. Scale bars = 10 $\mu$ M.
- Supplemental Fig.S2. **Time dependent effect of extracellular PCSK9 on the cell surface LDLR levels of HuH7 and HepG2 cells.** (A) FACS analysis of HuH7 and HepG2 cells for cell surface levels of LDLR following incubation of 0.7  $\mu$ g/ml of PCSK9 secreted from HEK293 cells overexpressing it (quantitated by ELISA) for various times from 30-240 min. The right panels show that if the HuH7 cells are washed with fresh medium lacking PCSK9 following the first 30 min, the effect of PCSK9 is completely abrogated, suggesting that a continuous presence of PCSK9 is needed to see its time dependent effect on LDLR. (B) Analysis of the data show the presence of two phases of LDLR decrease, an initial rapid phase faster in HepG2 cells, followed by a slower linear one similar in both cell lines (the best fit linear equation is depicted).
- Supplemental Fig.S3. **The pH dependence of PCSK9 activity is not regulated by the acidic stretch encompassing aa 31-58.** Various PCSK9 forms were pre-incubated at the indicated pHs for 1h, neutralized, and then incubated with HuH7 cells. FACS analysis of cell surface LDLR expression is shown compared to untreated cells. These data are representative of 2 independent experiments.
- Supplemental Fig.S4. **PCSK9 does not cleave *in vitro* soluble LDLR at any pH.** <sup>35</sup>S-labeled soluble LDLR was obtained from the media of HEK293 cells overexpressing the ectodomain of LDLR-V5 (aa 1-540) and pulsed for 3h with <sup>35</sup>S-[Met + Cys]. The media were incubated at 37°C for 3h at pHs 7.5, 6.5, 6.0, 5.5 and 4.5 in the presence (+) or absence (-) of ~0.7  $\mu$ g/ml of untagged PCSK9 secreted from HEK293 cells overexpressing it (quantitated by ELISA) or at pH 6.5 with 10  $\mu$ g/ml purified PCSK9 (Figure 1A). All media were then neutralized to pH 7.5 and the immunoprecipitated with mAb-V5 and separated by 8% SDS-PAGE, the gel dried and then autoradiographed. The migration positions of the less glycosylated and fully glycosylated LDLR (10) are shown.
- Supplemental Fig.S5. **Oligomerization of the cleaved forms of PCSK9 at pH 5.5.** SDS-PAGE analysis of the <sup>35</sup>S-labeled PCSK9 and its derivatives obtained from the media of HEK293 cells pulse labeled for 4h with <sup>35</sup>S-(Met+Cys). The samples were incubated for 1h at either pH 7.2 or 5.5 followed by neutralization, immunoprecipitation with mAb-V5 and then boiling in SDS buffer in the presence (+SH) or absence (-SH) of  $\beta$ -mercaptoethanol. With the exception of the CHRD, notice the propensity of the cleaved forms at pH 5.5 to oligomerize.
- Supplemental Fig.S6. **Inability of furin to generate *in vitro* PCSK9 (153-N<sub>x</sub>).** HEK293 cells were co-transfected with proCSK9-Prosegment (encoding V5-31-152) and either PCSK9- $\Delta$ Pro-V5 or PCSK9 (H226A)- $\Delta$ Pro-V5. The overnight media of these cells were incubated at either pH 7.2 or 5.5 for 1h at 37°C and the later neutralized to pH 7.2. In each case the media (200 ng of PCSK9) were incubated overnight in absence or presence of furin (5 units, Sigma). The media were then immunoprecipitated with Ab-03. The latter were separated by 8% SDS-PAGE and WB with Ab-03. Only the region representing the apparent molecular masses of 20-3.5 kDa is shown, together with the position of V5-Pro 31-152, PCSK9 (153-N<sub>x</sub>), PCSK9 (153-217) and PCSK9 (153-198?). The question mark emphasizes the hypothetical cleavage site at Arg<sub>199</sub> followed by carboxypeptidase action.

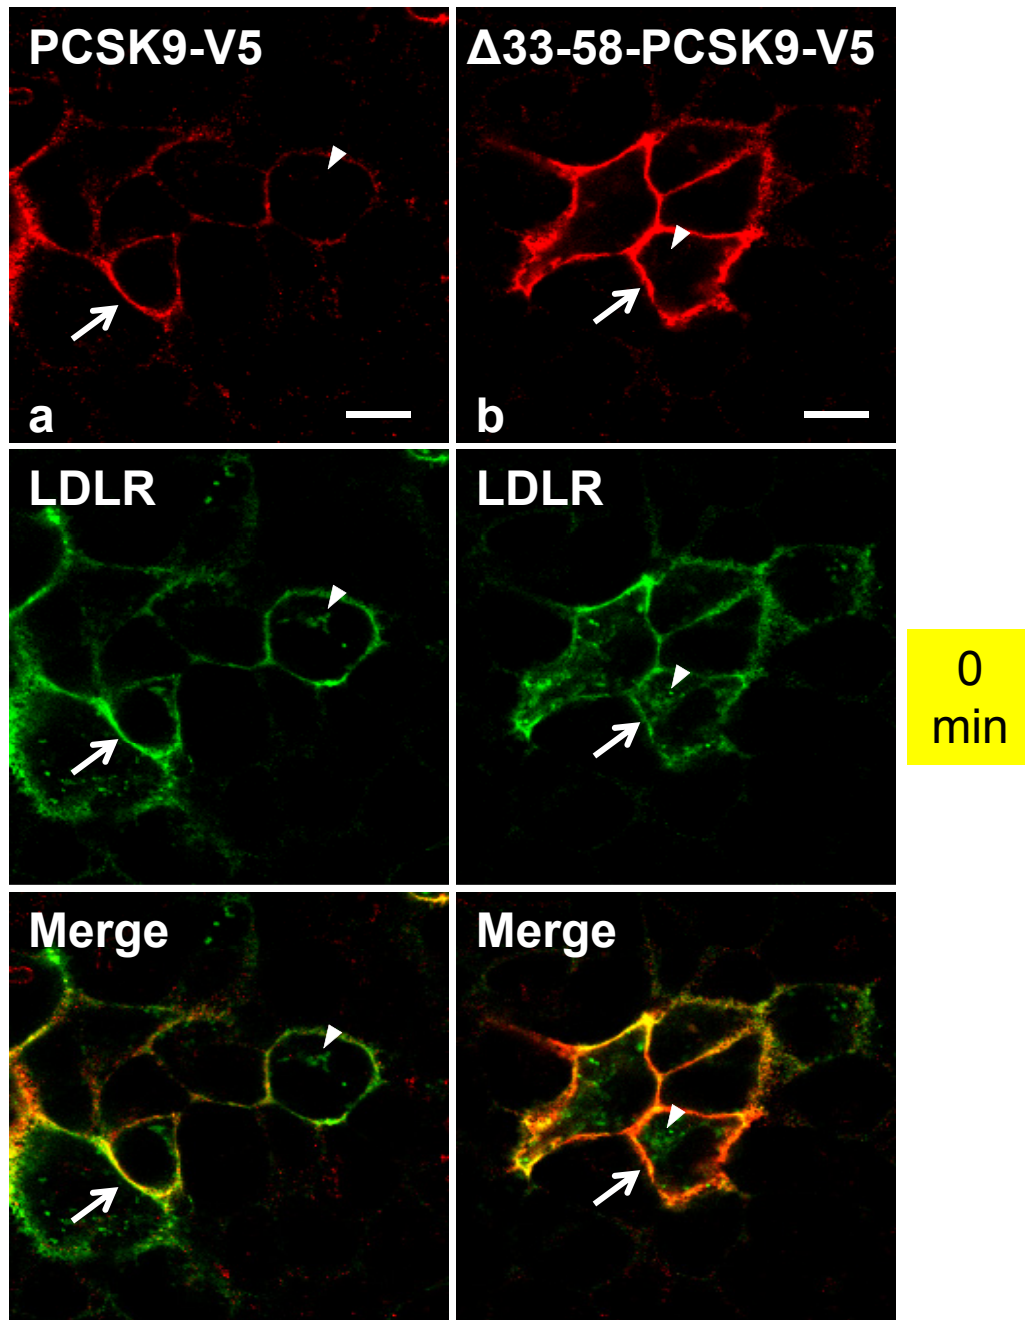

Figure S1A

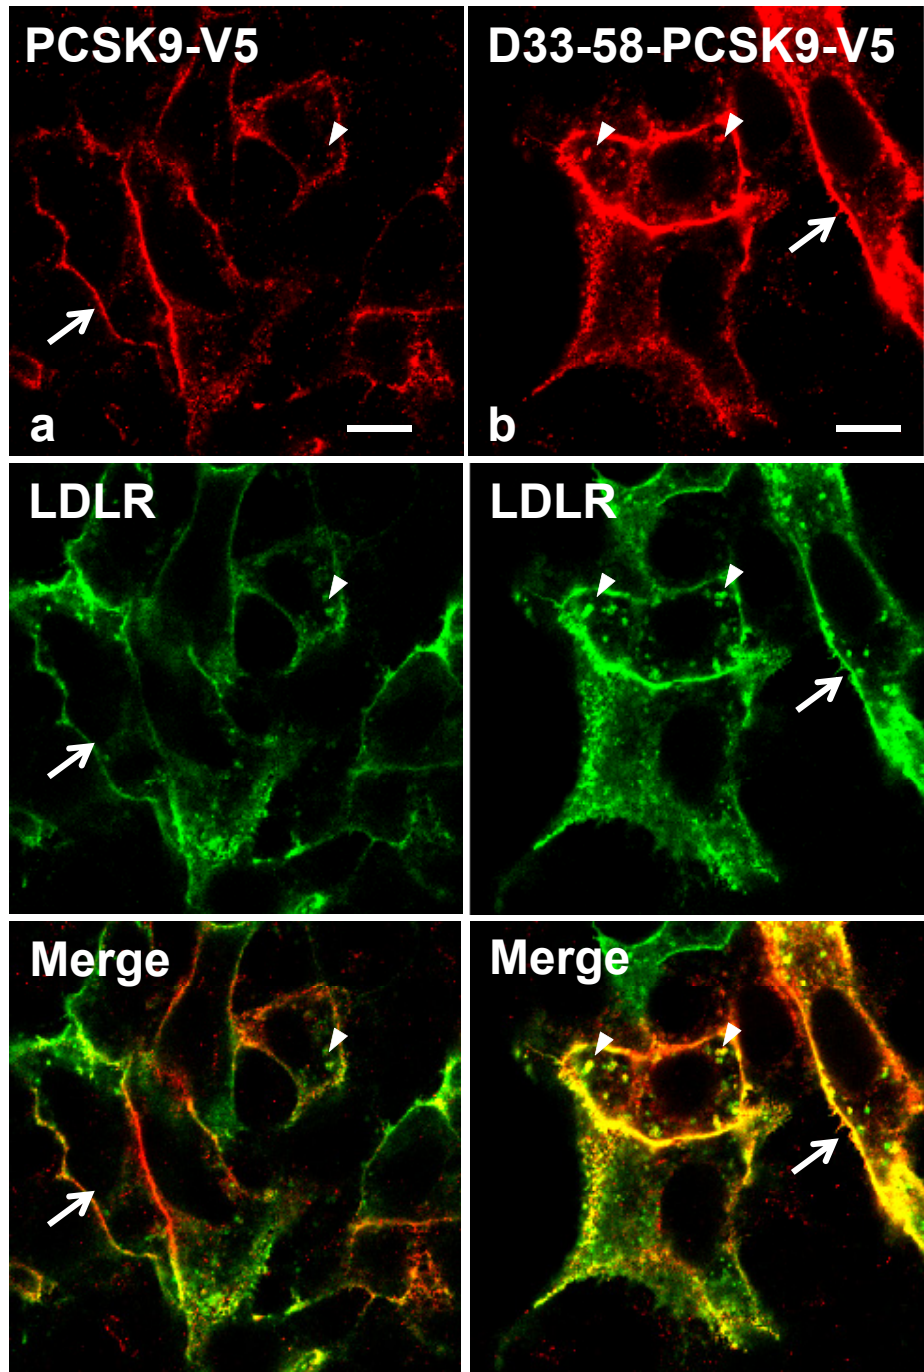

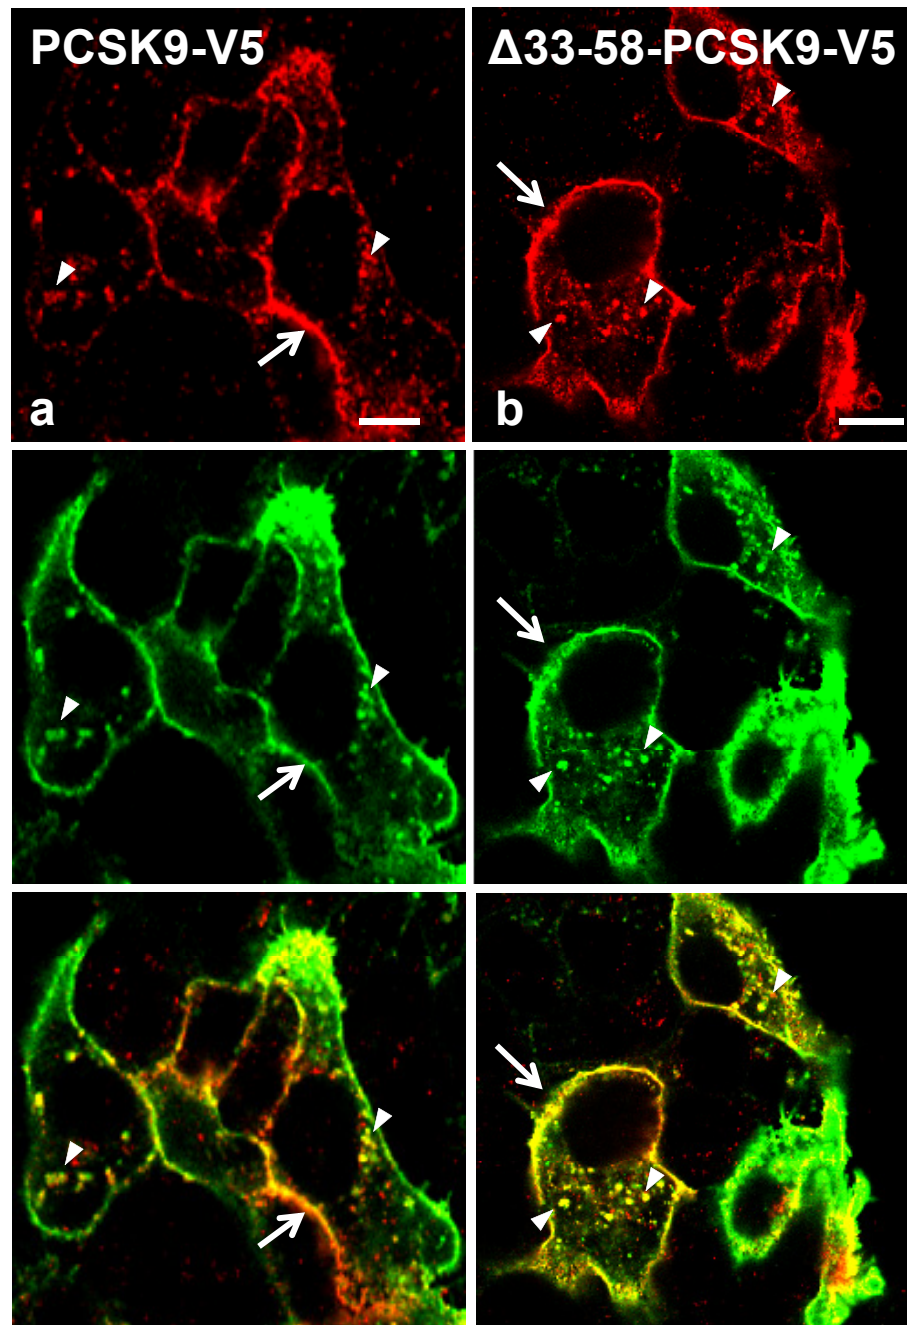

Figure S1C

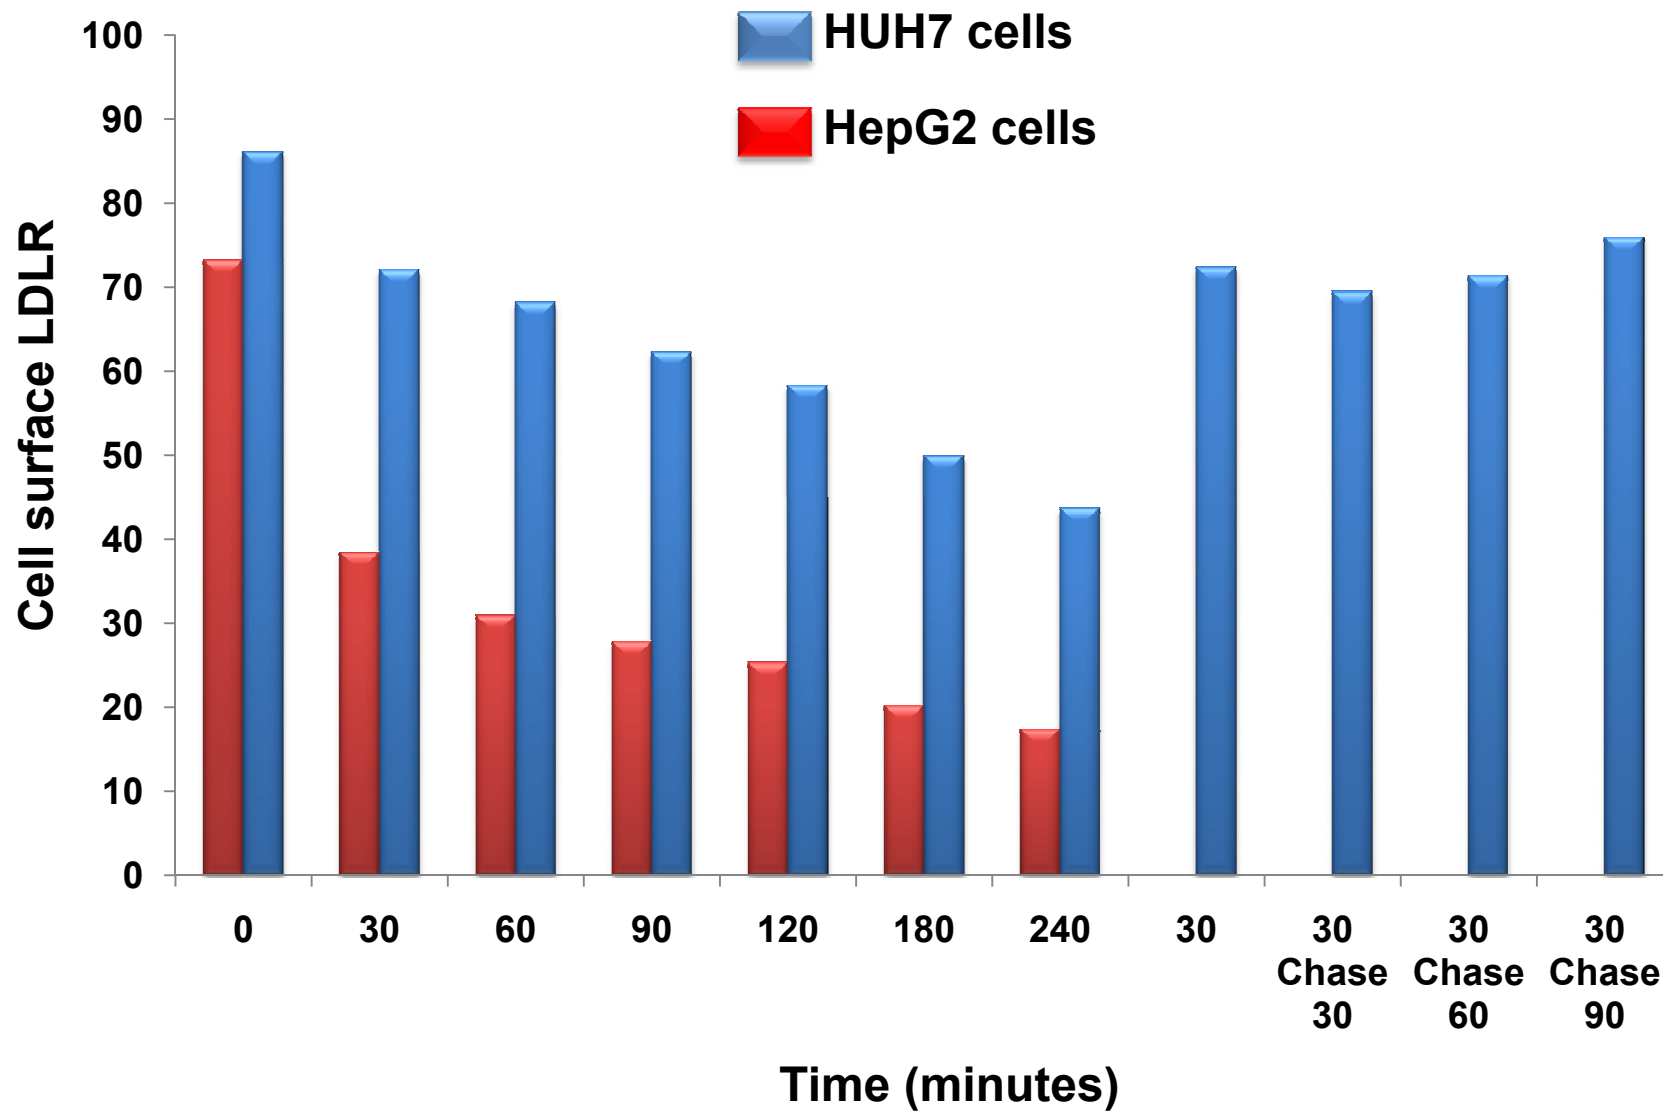

Figure S2A

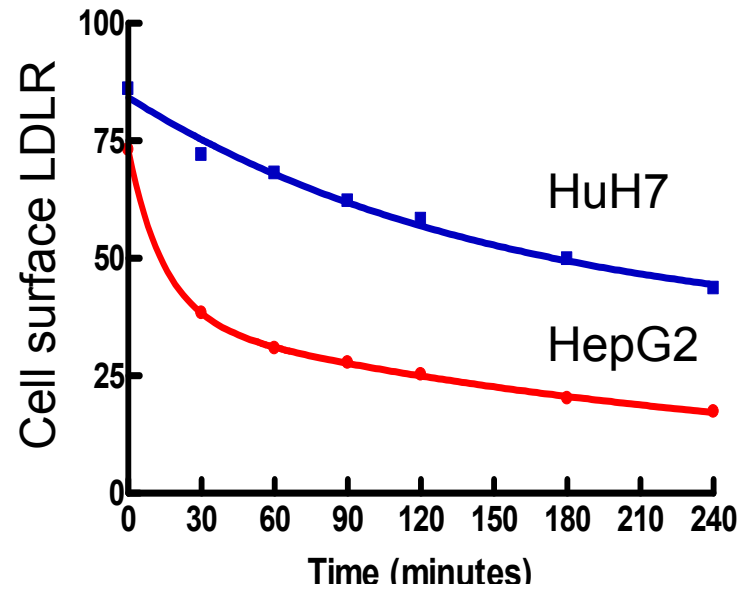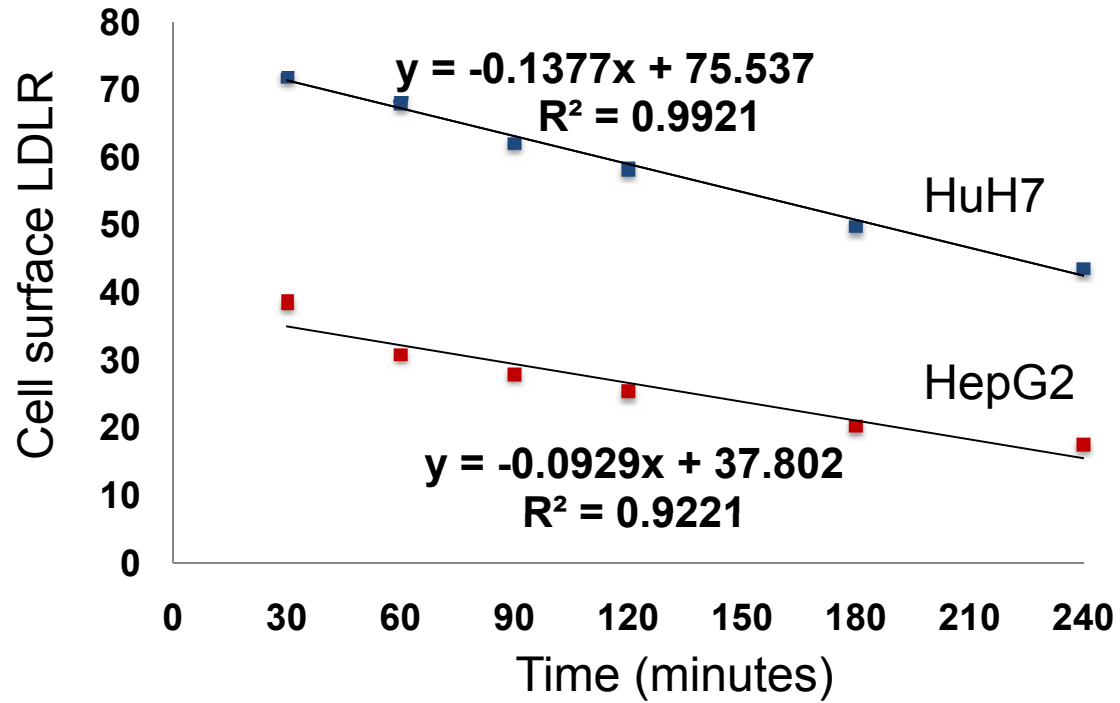

Figure S2B

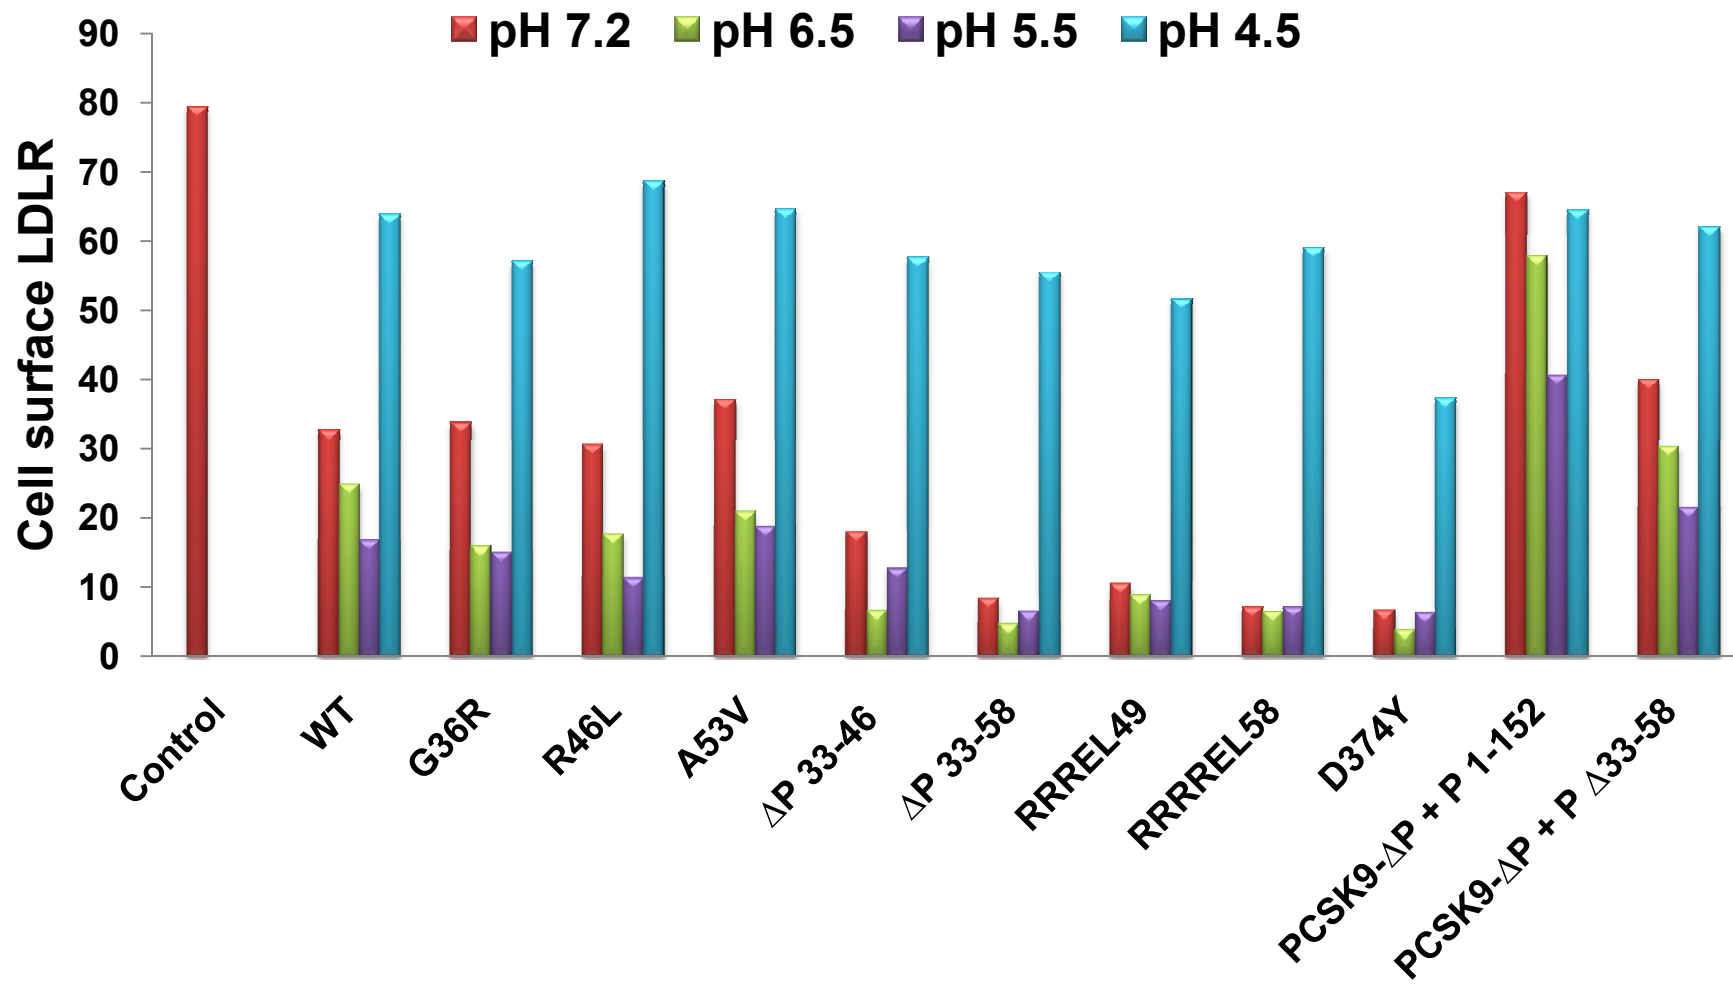

Figure S3



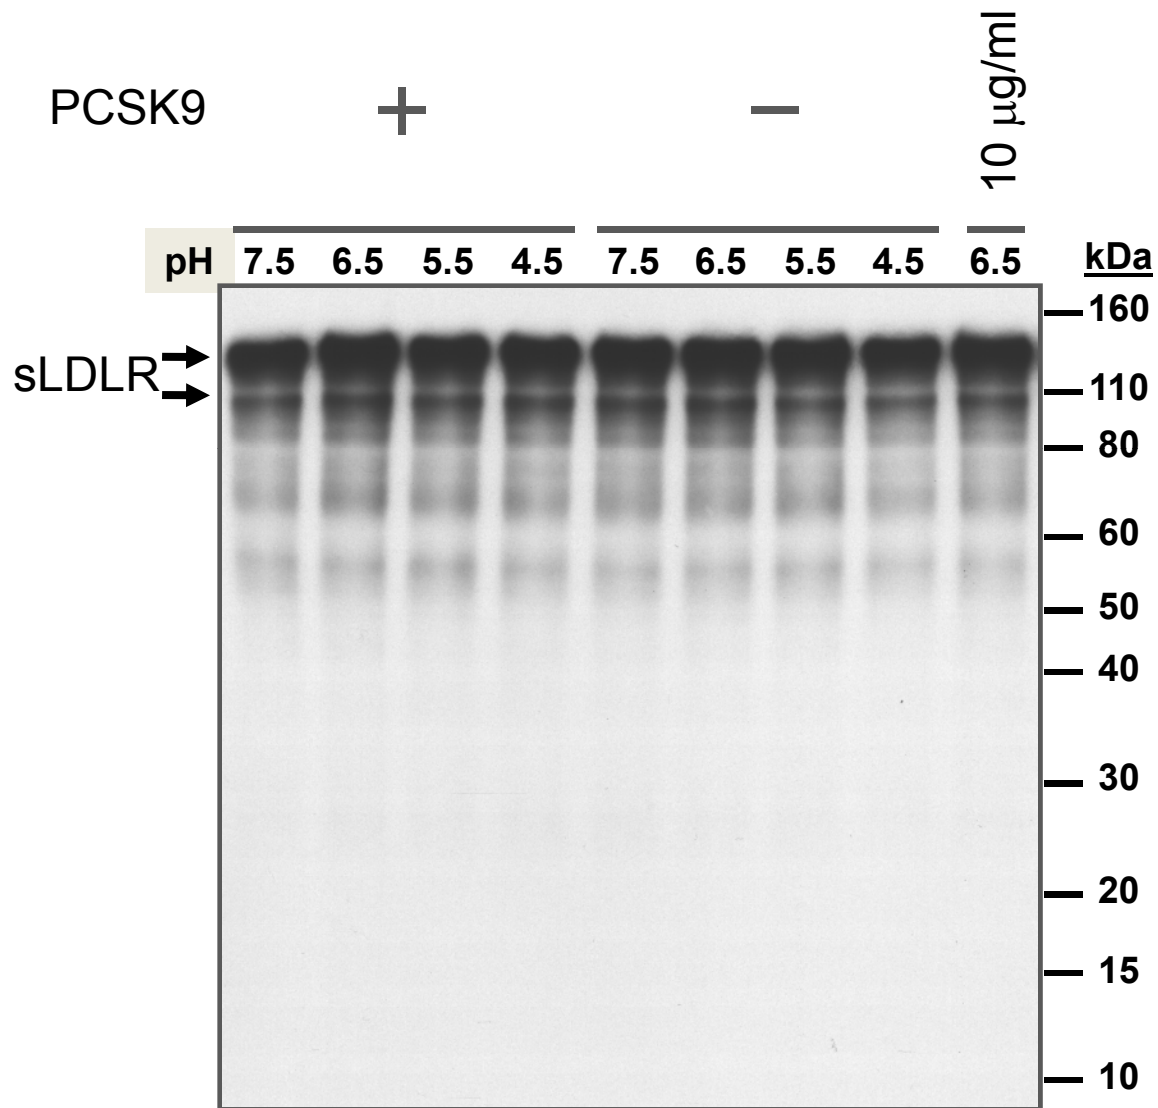

Figure S4



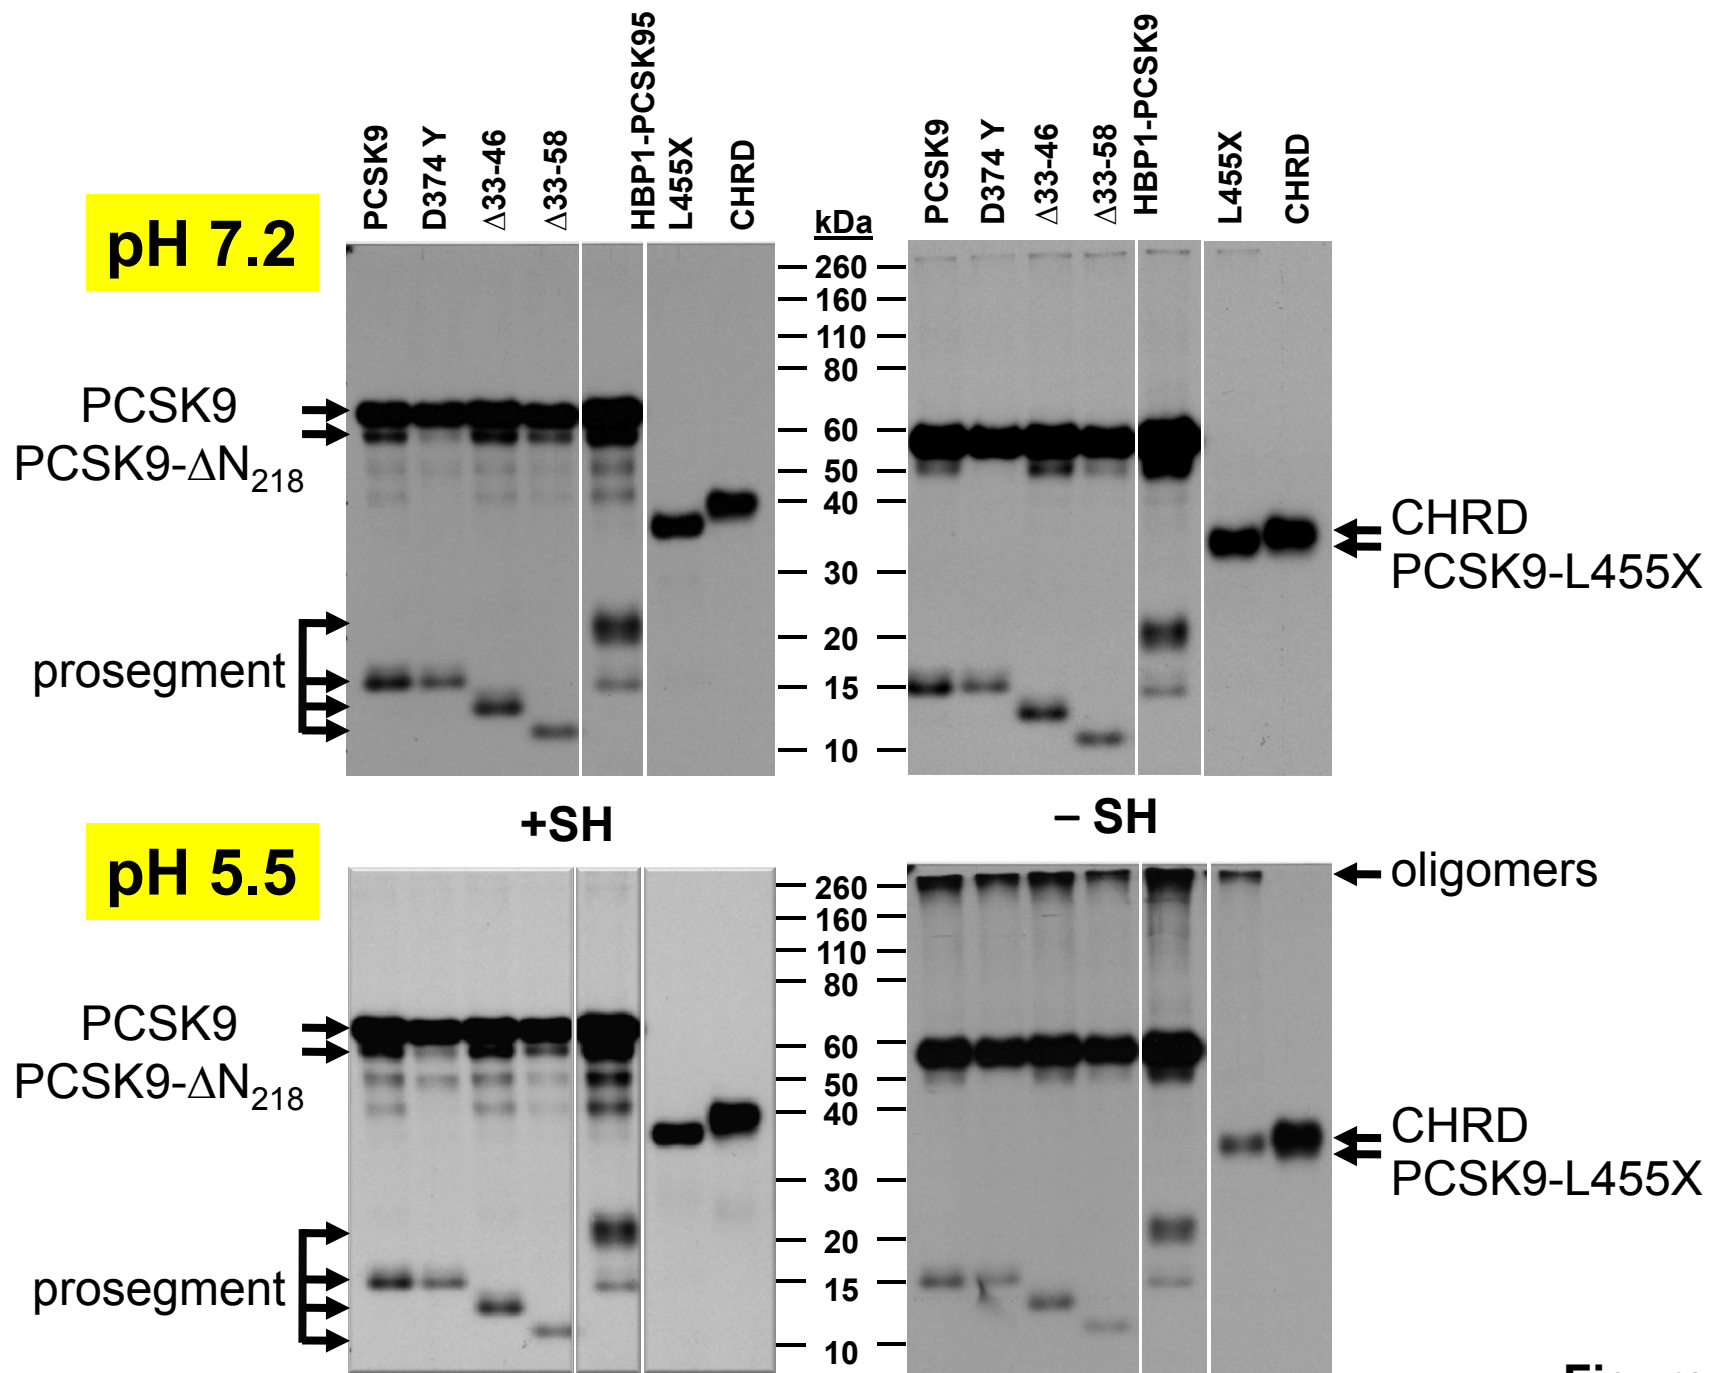

Figure S5

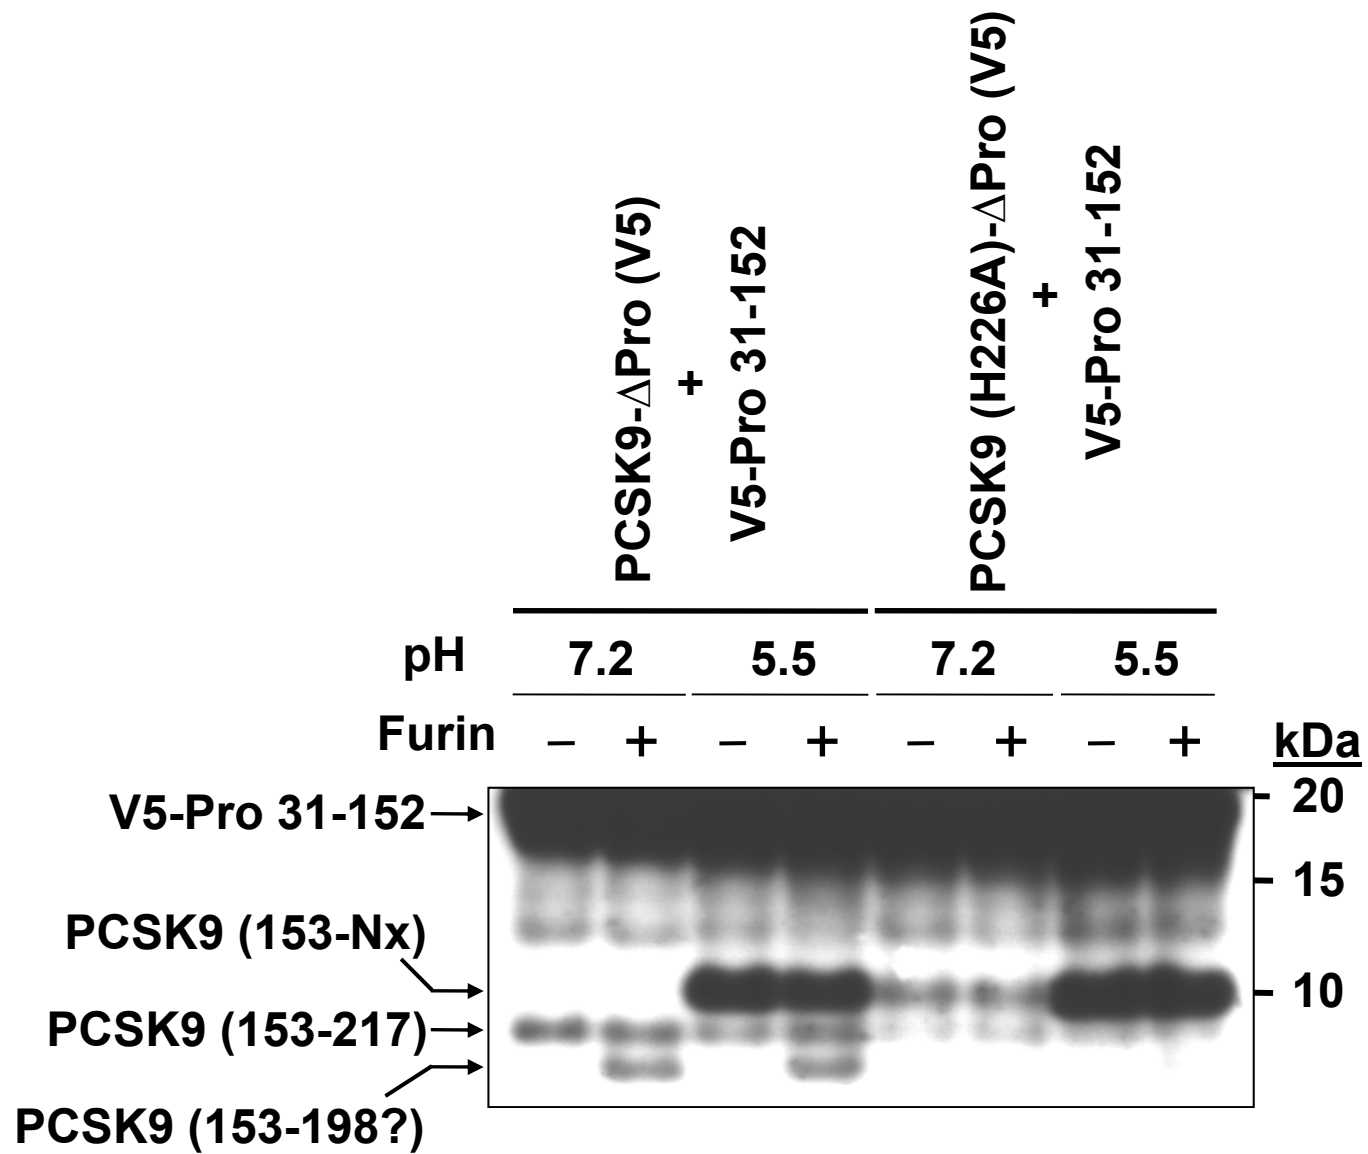

Figure S6
